# Supplementary material for: Core–shell particles and monolithic columns; tools for simultaneous LC analysis of avanafil, sildenafil, apomorphine, trazodone, yohimbine, tramadol and dapoxetine in pharmaceutical dosage forms, counterfeit products and human plasma
Source: Royal Society of Chemistry journal article supplement (doi:10.1039/c9ra08717f), 2020-01-01
Supplement: c9ra08717f1.pdf [file c9ra08717f1.pdf]

**Supplementary material table 1: Linearity and precision results for determination of drugs on core-shell and monolithic columns**

| Drug | Linearity equation | Regression<br>R <sup>2</sup> | Intra-day repeatability<br>(Recovery%± RSD*) |            |            | Inter-day intermediate precision<br>(Recovery%± RSD*) |           |            | Column                         |
|------|--------------------|------------------------------|----------------------------------------------|------------|------------|-------------------------------------------------------|-----------|------------|--------------------------------|
|      |                    |                              | QCL                                          | QCM        | QCH        | QCL                                                   | QCM       | QCH        |                                |
| APM  | Y=66.4X+31.8       | 0.999                        | 97.0± 1.0                                    | 100.2± 0.4 | 100.2± 0.2 | 95.0± 1.4                                             | 99.4± 0.4 | 100.0 ±0.2 | Chromolith® Performance RP-18e |
| TMD  | Y=15.4X+7.4        | 0.999                        | 93.0±1.2                                     | 99.4±0.4   | 99.8±1.0   | 94.2±1.0                                              | 99.4±0.4  | 99.4±0.4   |                                |
| YHB  | Y=39.0X+22.6       | 0.999                        | 96.6±2.8                                     | 99.8±0.2   | 100.0±0.5  | 95.6±1.0                                              | 99.2±0.6  | 100.2±0.4  |                                |
| AVN  | Y=25.6X-0.0        | 0.999                        | 93.6±1.4                                     | 98.5±0.2   | 98.4±0.6   | 95.4±5.0                                              | 98.2±0.6  | 98.2±0.2   |                                |
| TZD  | Y=65.0X+59.8       | 0.999                        | 93.8±1.8                                     | 101.2±0.2  | 102.2±0.8  | 94.2±1.2                                              | 101.2±0.2 | 102.0±0.8  |                                |
| SDN  | Y=35.8X+5.6        | 0.999                        | 98.6±2.4                                     | 99.4±0.4   | 100.2±1.4  | 97.2±1.8                                              | 99.6±0.4  | 98.2±0.4   |                                |
| DPX  | Y=80.8X+53.2       | 0.999                        | 93.6±4.6                                     | 101.1±0.4  | 99.6±0.6   | 94.4±1.2                                              | 101.4±1.1 | 99.6±0.2   |                                |
| APM  | Y=117.0X+250.4     | 0.994                        | 100.8±1.4                                    | 103.8±0.4  | 99.6±1.4   | 98.6±1.0                                              | 104.4±0.2 | 100.2±0.4  | Poroshell 120® EC-C18 2.7µm    |
| TMD  | Y=28.4X+24.8       | 0.998                        | 95.0±0.6                                     | 100.3±0.2  | 99.2±0.2   | 91.4±3.8                                              | 100.4±0.8 | 99.6±0.8   |                                |
| YHB  | Y=71.4X+115.2      | 0.997                        | 99.4±1.8                                     | 101.2±0.8  | 99.0±0.2   | 96.4±2.4                                              | 99.8±0.6  | 98.2±0.8   |                                |
| AVN  | Y=51.2X+22.6       | 0.998                        | 95.9±3.0                                     | 99.2±0.2   | 93.0±2.0   | 94.8±2.0                                              | 98.4±1.4  | 93.8±1.8   |                                |
| TZD  | Y=125.8X+142.2     | 0.996                        | 93.0±0.8                                     | 99.8±0.4   | 98.2±1.4   | 96.2±2.0                                              | 100.4±0.8 | 98.4±1.6   |                                |
| SDN  | Y=70.6X+93.0       | 0.998                        | 93.6±0.6                                     | 99.0±0.2   | 98.4±0.6   | 95.2±1.2                                              | 99.0±0.4  | 98.4±0.6   |                                |
| DPX  | Y=133.4X+515.0     | 0.994                        | 98.4±1.0                                     | 106.8±0.2  | 100.2±0.4  | 97.2±1.2                                              | 106.8±0.4 | 99.8±0.6   |                                |

\* RSD (%Relative standard deviation)

**Supplementary material table 2: Linearity and precision data for determination of drugs under study in plasma**

| Drug | Linearity equation | Regression R <sup>2</sup> | Intra-day repeatability (Recovery%± RSD*) |           |           |           | Inter-day intermediate precision (Recovery%± RSD*) |           |           |           |
|------|--------------------|---------------------------|-------------------------------------------|-----------|-----------|-----------|----------------------------------------------------|-----------|-----------|-----------|
|      |                    |                           | QCL1                                      | QCL2      | QCM       | QCH       | QCL1                                               | QCL2      | QCM       | QCH       |
| APM  | Y=7.4X+30.3        | 0.976                     | 90.8±5.0                                  | 101.2±1.2 | 108.0±2.0 | 91.0±1.4  | 92.4±5.0                                           | 102.4±3.0 | 106.6±2.4 | 91.0±1.6  |
| TMD  | Y=11.8X-2.4        | 0.999                     | 103.6±1.2                                 | 107.6±0.6 | 104.6±0.2 | 101.0±0.4 | 101.6±2.2                                          | 106.0±4.0 | 105.2±4.0 | 100.6±1.0 |
| YHB  | Y=31.8X-5.6        | 0.999                     | 95.2±0.8                                  | 106.4±0.8 | 103.6±0.2 | 101.6±0.4 | 96.4±1.6                                           | 104.2±3.4 | 103.2±0.2 | 100.0±2.4 |
| TZD  | Y=54.0X+11.8       | 0.999                     | 91.6±1.6                                  | 105.8±1.2 | 104.6±0.4 | 102.0±0.2 | 91.1±4.8                                           | 104.6±1.4 | 104.6±0.6 | 100.6±2.6 |
| AVN  | Y=20.8X-5.4        | 0.999                     | 102.4±0.4                                 | 99.2±1.4  | 105.2±1.0 | 100.4±0.2 | 104.4±2.2                                          | 97.0±4.0  | 105.0±0.8 | 100.8±3.6 |
| SDN  | Y=32.6X-8.0        | 0.999                     | 90.2±4.2                                  | 105.8±1.0 | 103.6±0.4 | 102.2±0.2 | 90.8±2.8                                           | 103.8±2.2 | 102.6±0.6 | 100.0±2.6 |
| DPX  | Y=64.0X-13.6       | 0.999                     | 94.0±0.5                                  | 105.8±0.6 | 103.0±0.6 | 102.6±0.2 | 92.4±6.0                                           | 106.4±2.6 | 102.2±0.4 | 100.0±3.0 |

\* RSD (%Relative standard deviation)

**Supplementary material table 3: Robustness results of the proposed method on core-shell and monolithic columns**

**\*Results were obtained for injections of QC-sample at concentration 50.0µg/mL of each drug**

| <b>Chromolith® performance RP-18e</b> |                                     |                    |                                          |                   |                                      |                   |
|---------------------------------------|-------------------------------------|--------------------|------------------------------------------|-------------------|--------------------------------------|-------------------|
| <b>Analyte</b>                        | <b>Changes in</b>                   |                    |                                          |                   |                                      |                   |
|                                       | <b>Buffer pH (3.4, 3.5 and 3.6)</b> |                    | <b>%Organic solvent (34, 35 and 36%)</b> |                   | <b>Temperature (33, 35 and 37°C)</b> |                   |
|                                       | <b>N*</b>                           | <b>% Recovery*</b> | <b>N</b>                                 | <b>% Recovery</b> | <b>N</b>                             | <b>% Recovery</b> |
| <b>APM</b>                            | 2700.0 ± 2.4                        | 99.8 ± 1.2         | 2700.0 ± 3.8                             | 98.6 ± 3.2        | 2700.0 ± 1.8                         | 99.0 ± 1.2        |
| <b>TMD</b>                            | 3300.0 ± 2.2                        | 98.6 ± 2.2         | 3300.0 ± 2.4                             | 98.6 ± 2.4        | 3200.0 ± 2.4                         | 99.2 ± 1.2        |
| <b>YHB</b>                            | 3300.0 ± 1.4                        | 100.0 ± 1.8        | 3200.0 ± 3.2                             | 98.8 ± 1.6        | 3300.0 ± 1.8                         | 98.6 ± 1.4        |
| <b>AVN</b>                            | 3200.0 ± 3.2                        | 98.6 ± 1.2         | 3200.0 ± 2.2                             | 98.4 ± 2.4        | 3100.0 ± 2.2                         | 99.0 ± 1.2        |
| <b>TZD</b>                            | 3200.0 ± 1.8                        | 100.0 ± 1.8        | 3100.0 ± 2.0                             | 100.0 ± 3.2       | 3300.0 ± 1.1                         | 100.2 ± 1.0       |
| <b>SDN</b>                            | 3300.0 ± 2.0                        | 99.0 ± 1.6         | 3200.0 ± 2.2                             | 98.6 ± 2.4        | 3300.0 ± 1.2                         | 100.2 ± 1.4       |
| <b>DPX</b>                            | 111000.0 ± 2.4                      | 100.4 ± 2.0        | 111700.0 ± 2.8                           | 100.6 ± 2.0       | 108600.0 ± 1.0                       | 100.4 ± 1.8       |
| <b>Poroshell 120® EC-C18 2.7µm</b>    |                                     |                    |                                          |                   |                                      |                   |
| <b>APM</b>                            | 11000.0 ± 7.6                       | 103.0 ± 1.8        | 11000.0 ± 2.8                            | 102.4 ± 2.2       | 11200.0 ± 3.6                        | 102.0 ± 1.4       |
| <b>TMD</b>                            | 15500.0 ± 1.6                       | 100.6 ± 2.0        | 15000.0 ± 2.4                            | 99.8 ± 1.4        | 14900.0 ± 2.2                        | 99.6 ± 1.0        |
| <b>YHB</b>                            | 15000.0 ± 2.2                       | 99.0 ± 1.6         | 14900.0 ± 2.4                            | 99.6 ± 1.4        | 15400.0 ± 1.8                        | 100.0 ± 1.8       |
| <b>AVN</b>                            | 15100.0 ± 3.4                       | 98.6 ± 2.8         | 15300.0 ± 3.4                            | 98.8 ± 1.0        | 15100.0 ± 1.2                        | 99.0 ± 0.8        |
| <b>TZD</b>                            | 15000.0 ± 2.6                       | 99.8 ± 1.2         | 14500.0 ± 2.2                            | 100.0 ± 0.8       | 14600.0 ± 2.6                        | 100.8 ± 1.2       |
| <b>SDN</b>                            | 16000.0 ± 3.2                       | 99.8 ± 1.4         | 16400.0 ± 3.2                            | 98.4 ± 2.2        | 16000.0 ± 1.6                        | 100.2 ± 0.8       |
| <b>DPX</b>                            | 341200.0 ± 3.0                      | 105.2 ± 1.6        | 340500.0 ± 3.0                           | 104.4 ± 1.8       | 334400.0 ± 2.8                       | 105.8 ± 1.4       |

**\* Results = Average ± %relative standard deviation**

**Supplementary material table 4: Robustness results of the proposed method for determination of drugs under study in plasma**

| Analyte    | Changes in                    |             |                       |            |                              |            |
|------------|-------------------------------|-------------|-----------------------|------------|------------------------------|------------|
|            | Temperature (33, 35 and 37°C) |             | %ACN (34, 35 and 36%) |            | Buffer pH (3.4, 3.5 and 3.6) |            |
|            | N*                            | % Recovery* | N                     | % Recovery | N                            | % Recovery |
| <b>APM</b> | 7400.0 ±2.6                   | 101.6 ±1.8  | 7500.0 ±3.6           | 100.8 ±4.6 | 7400.0 ±1.0                  | 104.6 ±3.0 |
| <b>TMD</b> | 4300.0 ±4.0                   | 108.0 ±3.0  | 4200.0 ±15.2          | 103.4 ±1.2 | 4100.0 ±6.4                  | 106.6 ±2.0 |
| <b>YHB</b> | 13100.0 ±1.6                  | 106.6 ±0.8  | 12700.0 ±3.2          | 102.2 ±3.0 | 12900.0 ±0.8                 | 106.4 ±0.8 |
| <b>AVN</b> | 18600.0 ±2.4                  | 100.0 ±0.6  | 18200.0 ±1.4          | 94.8 ±5.2  | 18400.0 ±1.0                 | 99.8 ±1.4  |
| <b>TZD</b> | 11700.0 ±0.6                  | 106.2 ±0.2  | 11000.0 ±5.8          | 107.4 ±3.2 | 11800.0 ±1.4                 | 105.8 ±1.0 |
| <b>SDN</b> | 17100.0 ±1.4                  | 105.6 ±1.2  | 16700.0 ±4.4          | 101.6 ±3.6 | 17400.0 ±2.4                 | 105.4 ±0.8 |
| <b>DPX</b> | 487600.0 ±0.6                 | 111.0 ±2.8  | 481200.0 ±3.4         | 105.0 ±4.8 | 499500.0 ±2.6                | 106.4 ±1.4 |

**\*Results were obtained for injections of QCL-sample at concentration 5µg/mL of each drug**

**\* Results = Average ± %relative standard deviation**
